# Supplementary material for: A cellular senescence-related genes model allows for prognosis and treatment stratification of cervical cancer: a bioinformatics analysis and external verification
Source: publisher site journal article supplement (doi:10.18632/aging.204981), 2023-09-27
Supplement: Supplementary file [file aging-v15i18-204981-supplementary-material-SD1.pdf]

## SUPPLEMENTARY FIGURE

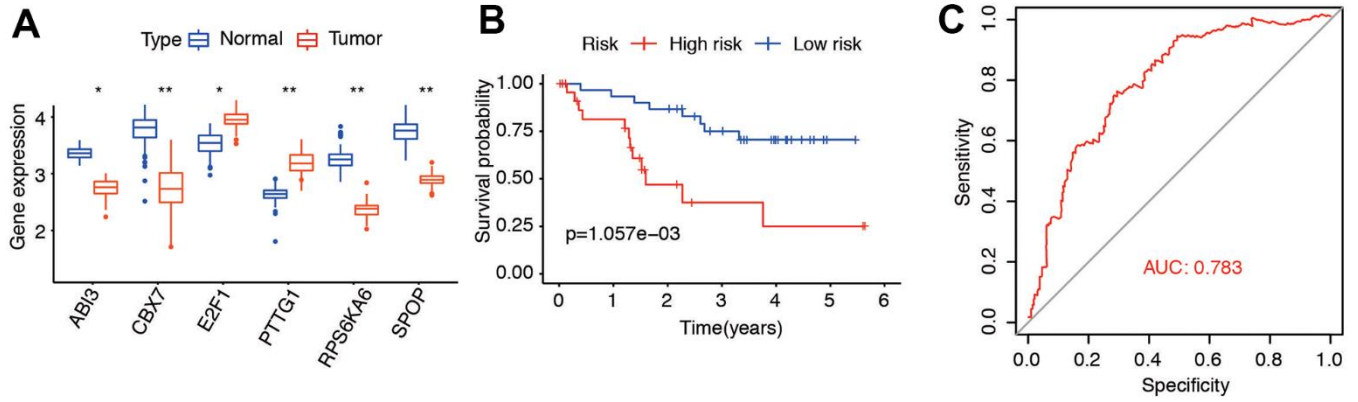

**Supplementary Figure 1. External validation of the six genes and related risk model with GSE52903.** (A) Gene expression of the six senescence-related genes in GSE52903dataset. (B) Survival curve of patients in low- and high-risk groups. (C) Predictive accuracy of the risk model in GSE52903.
