# Supplementary material for: A cellular senescence-related genes model allows for prognosis and treatment stratification of cervical cancer: a bioinformatics analysis and external verification
Source: Aging (Albany NY). 2023 Sep 27;15(18):9408–25. doi: 10.18632/aging.204981 (PMC10564413; doi:10.18632/aging.204981)
Supplement: Supplementary Table 1 [file aging-15-204981-s002.xlsx]

## Sheet: Sheet1
Supplementary Table 1. List of senescence related genes.
gene_name	senescence_effect
ACLY	Inhibits
AAK1	Induces
ABI3	Induces
ADCK5	Induces
AKR1B1	Inhibits
AGT	Induces
AKT1	Induces
ALOX15B	Induces
AR	Induces
ARPC1B	Induces
ASF1A	Induces
ASPH	Inhibits
ATF7IP	Inhibits
ATM	Inhibits
AURKA	Inhibits
AXL	Induces
BAG3	Inhibits
BHLHE40	Induces
BCL6	Inhibits
BLK	Induces
BLVRA	Inhibits
BMI1	Inhibits
BRAF	Induces
BRD7	Induces
BRCA1	Inhibits
BTG3	Inhibits
C11orf31	Inhibits
CAV1	Induces
CBX7	Inhibits
CBX8	Inhibits
CCND1	Induces
CDK1	Inhibits
CDK18	Induces
CDK2AP1	Inhibits
CDK6	Inhibits
CDK4	Inhibits
CDKN1A	Induces
CDKN1C	Induces
CDKN1B	Induces
CDKN2A	Induces
CDKN2AIP	Induces
CDKN2B	Induces
CENPA	Inhibits
CEBPB	Induces
CHEK1	Induces
CKB	Induces
CPEB1	Induces
CSNK1A1	Inhibits
CTNNAL1	Inhibits
CSNK2A1	Inhibits
CXCL1	Induces
DDB2	Induces
CYR61	Induces
DEK	Inhibits
DGCR8	Inhibits
DHCR24	Induces
DLX2	Inhibits
DHX9	Inhibits
DPY30	Inhibits
DUSP3	Inhibits
DUSP16	Inhibits
E2F1	Induces
EHF	Induces
ENDOG	Inhibits
EPHA3	Inhibits
ERRFI1	Induces
ETS1	Induces
ETS2	Induces
EWSR1	Induces
FASTK	Induces
EZH2	Inhibits
FBXO31	Induces
FOXM1	Inhibits
FOS	Inhibits
FOXO3	Inhibits
FXR1	Inhibits
G6PD	Inhibits
GAPDH	Inhibits
GKN1	Induces
GATA4	Induces
GNG11	Induces
GLB1	Inhibits
GRK6	Induces
HDAC4	Inhibits
HDAC1	Induces
HEPACAM	Induces
HJURP	Inhibits
HIVEP1	Inhibits
HK3	Induces
HMGB1	Inhibits
HRAS	Induces
HSPA5	Inhibits
HSPB2	Inhibits
ID1	Inhibits
ID4	Induces
IGFBP1	Induces
IFNG	Induces
IGFBP3	Induces
IGFBP6	Inhibits
IGFBP5	Induces
IL1A	Induces
IL8	Induces
ING1	Induces
ING2	Induces
IRF3	Induces
IRF5	Induces
IRF7	Induces
ITPK1	Induces
ITGB4	Induces
ITPKB	Induces
ITSN2	Induces
KCNJ12	Inhibits
KDM4A	Unclear
KDM5B	Inhibits
KIAA1524	Inhibits
KL	Inhibits
KSR2	Unclear
LATS1	Inhibits
LEO1	Unclear
LGALS3	Inhibits
LIMA1	Inhibits
LIMK1	Induces
MAGEA2	Inhibits
MAGOH	Inhibits
MAD2L1	Inhibits
MAGOHB	Inhibits
MAP2K1	Induces
MAP2K3	Inhibits
MAP2K2	Induces
MAP2K6	Induces
MAP3K6	Induces
MAP2K7	Induces
MAP4K1	Inhibits
MAP3K7	Induces
MAPK12	Induces
MAPKAPK5	Induces
MARCHF5	Inhibits
MAPK14	Induces
MAST1	Induces
MATK	Induces
MCL1	Inhibits
MDH1	Inhibits
MCRS1	Induces
MECP2	Inhibits
MOB3A	Induces
MMP9	Inhibits
MORC3	Induces
MORF4	Induces
MXD4	Induces
MVK	Induces
MYC	Inhibits
MYLK	Inhibits
NADK	Induces
NANOG	Inhibits
NDRG1	Induces
NEK1	Inhibits
NEK4	Induces
NEK6	Inhibits
NFE2L2	Inhibits
NINJ1	Induces
NOTCH3	Induces
NOX4	Induces
NR2E1	Unclear
NTN4	Inhibits
NUAK1	Induces
OTX2	Induces
P3H1	Inhibits
PATZ1	Inhibits
PAK4	Induces
PBRM1	Induces
PCGF2	Induces
PDCD10	Induces
PDIK1L	Induces
PDZD2	Induces
PDPK1	Induces
PEBP1	Induces
PEX19	Induces
PIAS4	Induces
PIK3R5	Induces
PIK3C2A	Unclear
PIM1	Induces
PLA2R1	Induces
PKM	Induces
PML	Induces
PNPT1	Induces
PMVK	Induces
POT1	Inhibits
POU5F1	Induces
PPM1B	Inhibits
PPM1D	Inhibits
PRMT6	Inhibits
PRKCH	Induces
PRKCD	Induces
PROX1	Induces
PRPF19	Inhibits
PSMB5	Inhibits
PTRF	Induces
PTTG1	Induces
PSMD14	Inhibits
RAD21	Inhibits
RAF1	Induces
RB1	Induces
RBP2	Inhibits
RBX1	Inhibits
RNASEL	Induces
RPS6KA6	Induces
RSL1D1	Inhibits
RUNX1	Induces
RUVBL2	Inhibits
SENP1	Inhibits
SENP2	Inhibits
SENP7	Inhibits
SERPINE1	Induces
SFN	Induces
SIK1	Induces
SGK1	Inhibits
SIN3B	Induces
SIRT1	Inhibits
SIRT6	Inhibits
SIX1	Inhibits
SLC13A3	Induces
SLC16A7	Inhibits
SMARCA4	Inhibits
SMG1	Inhibits
SMARCB1	Induces
SMURF2	Induces
SNAI1	Inhibits
SOCS1	Induces
SOD1	Inhibits
SORBS2	Induces
SOX2	Induces
SPIN1	Induces
SOX5	Induces
SP1	Induces
SPOP	Induces
SRC	Inhibits
SREBF1	Induces
SRSF1	Induces
STAT5B	Induces
STK32C	Induces
STK40	Induces
SUPT5H	Inhibits
SYK	Induces
TACC3	Inhibits
TERC	Inhibits
TBX2	Inhibits
TERF2	Inhibits
TERT	Inhibits
TFAP4	Induces
TFDP1	Inhibits
TGFB1I1	Induces
TLR3	Induces
TMSB4X	Inhibits
TNFSF13	Inhibits
TNFSF15	Induces
TOP1	Induces
TP63	Induces
TPR	Inhibits
TP53	Induces
TRIM28	Induces
TRPM8	Inhibits
TXN	Inhibits
TXNIP	Induces
UBTD1	Induces
TYK2	Induces
VENTX	Induces
USP1	Inhibits
VEGFA	Inhibits
WNT16	Induces
WNT2	Inhibits
WRN	Inhibits
WT1	Inhibits
XAF1	Induces
WWP1	Inhibits
YAP1	Inhibits
YPEL3	Induces
ZFP36	Induces
ZMAT3	Inhibits
ZNF148	Inhibits
