# Supplementary material for: A cellular senescence-related genes model allows for prognosis and treatment stratification of cervical cancer: a bioinformatics analysis and external verification
Source: Aging (Albany NY). 2023 Sep 27;15(18):9408–25. doi: 10.18632/aging.204981 (PMC10564413; doi:10.18632/aging.204981)
Supplement: Supplementary Table 3 [file aging-15-204981-s004.xlsx]

## Sheet: mirnaDiff
Supplementary Table 3. Differentially expressed genes between low and high risk groups.
id	logFC	AveExpr	t	P.Value	adj.P.Val	B
DDX21	1.06629	10.4467	9.52287	6.84214e-19	2.33465e-15	32.202
RNF168	1.19446	7.87634	9.13763	1.12234e-17	2.29778e-14	29.487
ZC3HAV1L	1.20002	4.7598	8.98659	3.30517e-17	5.6389e-14	28.4391
LATS1	1.00666	7.31797	8.96832	3.7641e-17	5.92788e-14	28.313
CCNT1	1.40437	5.91573	8.9011	6.06496e-17	8.27786e-14	27.8503
LOC284441	1.13987	5.65211	8.80374	1.20606e-16	1.37176e-13	27.1836
TAOK1	1.1599	7.0473	8.63987	3.79966e-16	3.24127e-13	26.0709
MGAT5	1.53586	6.18924	8.55709	6.75243e-16	4.93723e-13	25.5135
KLHL11	1.14386	4.46272	8.49615	1.02902e-15	6.79585e-13	25.1052
FRRS1	1.47295	6.941	8.47612	1.18143e-15	7.55859e-13	24.9713
LIMS1	1.03004	7.66706	8.39662	2.04e-15	1.15359e-12	24.442
PRKAR2A	1.21077	6.95474	8.39344	2.08483e-15	1.15359e-12	24.4209
CASC5	1.21277	7.99753	8.36725	2.49409e-15	1.34373e-12	24.2472
ETV3	1.32162	6.91517	8.25384	5.39971e-15	2.26227e-12	23.4989
SOCS7	1.01273	5.11575	8.20521	7.50523e-15	2.89914e-12	23.18
SBNO1	1.24989	8.03038	8.19242	8.18307e-15	3.10244e-12	23.0962
RAPGEF6	1.21758	6.81061	8.18233	8.7599e-15	3.22305e-12	23.0303
C9orf129	1.20285	5.51857	8.14484	1.12774e-14	4.05056e-12	22.7856
REST	1.36624	6.83463	8.13656	1.19231e-14	4.20865e-12	22.7317
GTF2A1	1.25214	6.42707	8.10005	1.52368e-14	4.68187e-12	22.4942
TGFBRAP1	1.163	7.27337	8.09706	1.5545e-14	4.68187e-12	22.4748
PSIMCT-1	1.06626	3.66748	8.07537	1.7977e-14	5.11171e-12	22.3341
IPMK	1.28473	4.93438	8.02756	2.47439e-14	6.75443e-12	22.0247
ZNF699	1.14965	3.6698	8.02351	2.54219e-14	6.84819e-12	21.9986
SHPRH	1.22031	7.12435	7.97689	3.46721e-14	8.87302e-12	21.6982
PTPLB	1.44926	7.1994	7.86103	7.46196e-14	1.54312e-11	20.9563
C9orf41	1.0117	6.60698	7.85309	7.86198e-14	1.58699e-11	20.9058
ZDHHC20	1.41166	6.9325	7.84721	8.17257e-14	1.62444e-11	20.8683
ARL10	1.08221	4.42899	7.74412	1.6056e-13	3.00953e-11	20.2149
ASXL2	1.09198	8.21649	7.74304	1.617e-13	3.00953e-11	20.2081
SERINC5	1.41834	6.47817	7.73707	1.68125e-13	3.07842e-11	20.1704
HIPK3	1.27965	8.32851	7.73088	1.75044e-13	3.1714e-11	20.1314
GOLIM4	1.25652	9.05232	7.63441	3.2742e-13	5.36262e-11	19.5257
STRN	1.03052	7.64982	7.5477	5.724e-13	8.49185e-11	18.9856
EXOC6B	1.20892	6.72105	7.52107	6.78973e-13	9.929e-11	18.8206
PPTC7	1.1234	8.60601	7.51371	7.11726e-13	1.02614e-10	18.775
ZNF354C	1.32297	3.91153	7.50078	7.7309e-13	1.09197e-10	18.6951
SGK196	1.01645	4.15379	7.44451	1.10687e-12	1.50073e-10	18.3482
HSH2D	-1.18789	7.33835	-7.42095	1.28564e-12	1.68724e-10	18.2035
RRAGC	1.00631	8.0708	7.38144	1.65151e-12	2.10008e-10	17.9615
DDI2	1.37933	5.59449	7.35534	1.94769e-12	2.41667e-10	17.8022
BARD1	1.26529	6.52281	7.33127	2.26694e-12	2.74622e-10	17.6555
GAS2L3	1.35025	5.08108	7.27984	3.13183e-12	3.58201e-10	17.3434
KLF7	1.09503	6.1996	7.22647	4.37296e-12	4.78757e-10	17.021
ANKRD36BP1	1.29257	5.68226	7.15561	6.79451e-12	6.81882e-10	16.5955
UHMK1	1.19659	7.54297	7.06347	1.1999e-11	1.07744e-09	16.0466
KLHL23	1.2004	5.81305	6.97165	2.1044e-11	1.74939e-09	15.5046
IL6ST	1.42609	7.30842	6.96594	2.17886e-11	1.79148e-09	15.4711
SYNC	-1.56018	7.50171	-6.92869	2.73238e-11	2.1988e-09	15.2528
TBC1D10C	-1.14601	6.84499	-6.90413	3.17094e-11	2.49687e-09	15.1092
PTPRCAP	-1.13015	7.87097	-6.89407	3.36973e-11	2.6132e-09	15.0506
HNMT	-1.01905	7.41099	-6.8456	4.51388e-11	3.25397e-09	14.7688
NIPAL1	1.31145	4.86992	6.83306	4.86752e-11	3.47885e-09	14.6961
NCOA2	1.21864	7.70132	6.8091	5.62017e-11	3.9004e-09	14.5575
LDLRAD3	1.12926	6.51996	6.7864	6.43844e-11	4.35031e-09	14.4265
ISG15	-1.18302	11.3432	-6.78354	6.54964e-11	4.41088e-09	14.41
WNT9A	1.24149	4.83262	6.71904	9.61903e-11	6.15408e-09	14.0396
ZNF827	1.07366	6.03614	6.55194	2.57304e-10	1.45054e-08	13.0922
FAM157A	1.245	3.72442	6.51804	3.1348e-10	1.71601e-08	12.9021
CDKL5	1.05697	3.33391	6.48252	3.85256e-10	2.03282e-08	12.7037
RAMP1	-1.31991	7.46214	-6.47314	4.06766e-10	2.12985e-08	12.6514
ULBP3	1.02103	5.3642	6.3883	6.6307e-10	3.19413e-08	12.1814
GPR156	1.25934	2.74121	6.35687	7.93756e-10	3.6683e-08	12.0085
GPR176	1.15942	5.45114	6.33538	8.97333e-10	4.01116e-08	11.8906
SPNS3	-1.07371	3.36014	-6.32541	9.49767e-10	4.22492e-08	11.836
FAM83G	1.00403	8.15645	6.32275	9.64235e-10	4.26367e-08	11.8214
EDIL3	1.57394	4.50233	6.32078	9.75112e-10	4.29322e-08	11.8106
DDN	1.21087	3.60858	6.30724	1.05311e-09	4.5486e-08	11.7367
HCST	-1.0098	6.78878	-6.2743	1.26941e-09	5.3038e-08	11.5572
ERN1	1.00816	5.79828	6.27302	1.27866e-09	5.33156e-08	11.5502
UGCG	1.03906	7.84854	6.27063	1.29605e-09	5.37125e-08	11.5372
DENND2C	1.53869	6.83192	6.26104	1.36829e-09	5.6251e-08	11.4851
MED12L	1.0508	2.82754	6.21627	1.76103e-09	6.89362e-08	11.2427
GPR157	1.18106	5.47131	6.19956	1.93432e-09	7.43373e-08	11.1525
LOC650623	1.05331	4.77391	6.18356	2.11583e-09	8.02173e-08	11.0664
CFB	-1.37025	11.2688	-6.17387	2.23378e-09	8.36053e-08	11.0143
RARRES3	-1.13623	9.46501	-6.14867	2.57147e-09	9.4347e-08	10.8791
ATP2A3	-1.05169	9.26932	-6.11659	3.0743e-09	1.09271e-07	10.7076
IFITM1	-1.00215	12.1644	-6.09609	3.44489e-09	1.20433e-07	10.5984
CRIP1	-1.1263	10.7842	-6.05622	4.29459e-09	1.42965e-07	10.3868
LPAR3	1.55249	6.20226	6.04165	4.65386e-09	1.53428e-07	10.3098
EGFR	1.12652	9.58831	6.01857	5.28378e-09	1.71163e-07	10.188
ACY3	-1.4405	4.93161	-5.92259	8.92321e-09	2.64761e-07	9.68551
TSPAN5	1.10663	6.02565	5.85636	1.27643e-08	3.60943e-07	9.34245
ZNF192	1.10087	6.82925	5.83651	1.42024e-08	3.95598e-07	9.24018
NBPF10	1.02163	8.281	5.80008	1.72627e-08	4.63968e-07	9.05329
TMEM176A	-1.0485	8.23381	-5.77836	1.93846e-08	5.10458e-07	8.94228
CCL5	-1.12507	9.7678	-5.77563	1.96686e-08	5.15589e-07	8.92835
GGTLC2	-1.00438	4.92187	-5.77196	2.00564e-08	5.23075e-07	8.90966
TMEM176B	-1.02922	9.37054	-5.72199	2.61492e-08	6.53666e-07	8.65576
P2RY1	1.54123	6.28495	5.62269	4.40723e-08	1.01839e-06	8.15642
DARC	-1.45307	5.97429	-5.55056	6.41176e-08	1.41148e-06	7.7981
CCDC42B	-1.12631	4.03383	-5.54722	6.52335e-08	1.42684e-06	7.78162
KIRREL	1.28364	5.75854	5.54333	6.65574e-08	1.44747e-06	7.76242
FLG	1.73475	4.04874	5.53305	7.01873e-08	1.51576e-06	7.71169
ALDH3B1	-1.00205	8.32639	-5.52862	7.18095e-08	1.53943e-06	7.68986
SERPINA1	-1.1801	9.88273	-5.51928	7.53502e-08	1.60191e-06	7.64389
VIPR2	-1.35295	3.83482	-5.51324	7.77287e-08	1.64056e-06	7.6142
IFI6	-1.07432	11.9799	-5.5114	7.84688e-08	1.65143e-06	7.60515
ZNF683	-1.37217	5.88148	-5.48638	8.9228e-08	1.83985e-06	7.48244
SESN3	1.01431	5.95471	5.48589	8.94541e-08	1.8406e-06	7.48002
KLRB1	-1.02667	5.13208	-5.46534	9.93779e-08	2.00055e-06	7.37957
TRIM9	1.14608	4.74138	5.45383	1.05393e-07	2.10099e-06	7.32347
FAM83B	1.14252	7.68429	5.43498	1.16025e-07	2.27744e-06	7.23174
PLA1A	-1.14711	4.90948	-5.43062	1.18628e-07	2.31744e-06	7.21056
SLC6A10P	1.22882	4.3014	5.41575	1.27937e-07	2.47333e-06	7.13847
WNT3	1.00167	4.06961	5.40692	1.33798e-07	2.56245e-06	7.09573
GJA3	1.34689	3.90843	5.40266	1.36721e-07	2.6111e-06	7.07511
CD3D	-1.05855	6.8886	-5.35783	1.71473e-07	3.18275e-06	6.85907
LOC154822	-1.08578	2.36699	-5.30367	2.24995e-07	4.05486e-06	6.60009
RASEF	1.29816	6.14866	5.3008	2.28248e-07	4.10265e-06	6.58641
GPR35	-1.03	5.75652	-5.26491	2.72925e-07	4.75135e-06	6.41606
TMEM125	-1.01406	7.87595	-5.26399	2.74177e-07	4.76504e-06	6.4117
TMED7-TICAM2	1.15625	5.4011	5.15361	4.7237e-07	7.53766e-06	5.89378
KIAA0754	1.00353	5.00468	5.14389	4.95324e-07	7.87326e-06	5.84863
OASL	-1.02183	8.77714	-5.13945	5.06183e-07	8.00857e-06	5.828
TRPV3	1.1902	3.90413	5.1245	5.44434e-07	8.5477e-06	5.7587
LOC100130933	-1.26041	2.33046	-5.09497	6.28375e-07	9.66546e-06	5.62234
GZMH	-1.14975	5.68233	-4.9757	1.11407e-06	1.57626e-05	5.07826
CCL14	-1.23315	4.28795	-4.89933	1.5987e-06	2.14343e-05	4.73555
HAS3	1.30956	9.42939	4.87386	1.80152e-06	2.36731e-05	4.62228
CHRNB4	1.32938	4.54887	4.87346	1.80492e-06	2.36873e-05	4.6205
NKG7	-1.01446	7.3733	-4.85842	1.93643e-06	2.51392e-05	4.55383
TNFSF12-TNFSF13	-1.32833	6.19	-4.85337	1.98258e-06	2.56084e-05	4.5315
PTGDS	-1.16299	8.07881	-4.8379	2.13078e-06	2.71459e-05	4.46318
APLN	1.07392	6.19913	4.83155	2.19466e-06	2.7633e-05	4.43519
FXYD2	-1.04581	2.73776	-4.83104	2.19989e-06	2.76819e-05	4.43294
IFI44L	-1.12238	9.41049	-4.80017	2.53858e-06	3.11958e-05	4.29728
MSLN	-2.00316	9.41942	-4.79046	2.655e-06	3.23547e-05	4.25482
TCHH	1.39367	4.96182	4.76551	2.97859e-06	3.57868e-05	4.14593
FAM66D	-1.00833	2.93751	-4.71533	3.74847e-06	4.36284e-05	3.92838
CACNA2D1	1.33742	3.20882	4.70373	3.952e-06	4.56342e-05	3.87837
SLC28A3	1.1873	5.28671	4.67523	4.49813e-06	5.08459e-05	3.75598
ADAMTS15	1.18937	3.29469	4.6388	5.30275e-06	5.89376e-05	3.60046
TESC	-1.18692	4.91493	-4.61076	6.01477e-06	6.56049e-05	3.48145
CNTN1	1.49865	4.74048	4.6032	6.22203e-06	6.76852e-05	3.44946
PPP1R14D	-1.06267	1.96706	-4.58843	6.64669e-06	7.17188e-05	3.38712
CAPN8	-1.60622	3.97419	-4.55121	7.84424e-06	8.2389e-05	3.23078
PTHLH	1.37852	7.73435	4.50403	9.66239e-06	9.88596e-05	3.03419
SLC6A11	1.47128	4.42474	4.50169	9.7626e-06	9.96857e-05	3.02446
LRP4	1.02065	7.15404	4.50089	9.79679e-06	9.98649e-05	3.02116
UBD	-1.21975	9.42283	-4.49493	1.00571e-05	0.000102082	2.99644
GJB6	1.89298	7.94355	4.47829	1.08185e-05	0.000108572	2.92767
ABP1	-1.4938	5.90589	-4.42995	1.33576e-05	0.000129371	2.7291
PCDHGA10	1.10894	3.86854	4.42983	1.33649e-05	0.000129371	2.72859
SFTA2	-1.60656	3.11049	-4.4265	1.35595e-05	0.000131007	2.71498
LGALS4	-1.43533	3.65678	-4.42502	1.36468e-05	0.000131664	2.70894
EFCAB4A	-1.06114	7.64567	-4.3954	1.5513e-05	0.000146291	2.58831
WFDC5	1.52519	4.19979	4.37311	1.70763e-05	0.000159127	2.49799
GZMK	-1.03372	5.67436	-4.34864	1.89665e-05	0.000173272	2.39928
LGALS2	-1.0249	4.03964	-4.3323	2.03384e-05	0.000183431	2.33364
JSRP1	-1.05702	4.34852	-4.32019	2.14156e-05	0.000191459	2.28515
CCL19	-1.38062	5.60964	-4.31017	2.2348e-05	0.000198667	2.24511
MIA	-1.39759	3.62467	-4.30539	2.28065e-05	0.000201954	2.22604
IGJ	-1.2084	9.40486	-4.26375	2.71987e-05	0.000234459	2.06068
SFRP4	-1.48416	8.25048	-4.20343	3.50187e-05	0.000288522	1.82365
SERPINB13	2.10451	9.02333	4.16281	4.14479e-05	0.000331211	1.66573
MLPH	-1.11241	8.6542	-4.13502	4.64787e-05	0.000364303	1.55848
TMPRSS3	-1.32718	7.12102	-4.13114	4.72267e-05	0.000368447	1.54353
CA12	1.00055	10.3881	4.12012	4.94109e-05	0.000382309	1.50123
PNCK	1.28045	5.53357	4.09801	5.40897e-05	0.000411359	1.4166
TRIM31	-1.3819	5.58644	-4.08537	5.695e-05	0.000429921	1.36841
MGC29506	-1.09648	7.32419	-4.05311	6.49169e-05	0.000481712	1.24604
MUC16	-1.75434	8.80795	-4.05277	6.50087e-05	0.000481869	1.24472
MYO1A	-1.00728	2.38262	-4.03255	7.05395e-05	0.000515585	1.16846
MYO7B	-1.27089	3.06957	-4.02735	7.20325e-05	0.000524812	1.1489
FAT2	1.49211	10.4783	3.99445	8.21983e-05	0.000588035	1.02569
ADAM6	-1.1881	13.5472	-3.94203	0.000101261	0.000701798	0.831226
RORC	-1.01907	7.05894	-3.89782	0.000120528	0.000808507	0.669019
PSCA	-1.27263	7.73323	-3.89587	0.000121454	0.00081339	0.661892
IL1F5	1.38861	4.67315	3.87358	0.000132518	0.000874048	0.580775
TFF1	-1.45426	2.98621	-3.87305	0.000132792	0.000875293	0.578852
TNNC1	-1.1609	3.67798	-3.87066	0.000134036	0.000881485	0.570179
DEFB1	-1.09117	7.66333	-3.86648	0.000136238	0.000893117	0.555026
FOXP2	1.09186	3.16987	3.83793	0.000152221	0.000975733	0.451903
USH1G	1.07977	5.09163	3.78458	0.000186953	0.00116514	0.261048
KRT75	1.43871	5.53842	3.77993	0.000190313	0.00118284	0.244519
GABRQ	1.23358	4.08893	3.75769	0.000207184	0.00126942	0.16574
C5orf49	-1.13355	2.47859	-3.69401	0.000263624	0.00154558	-0.0574495
RAET1L	1.04451	4.20028	3.6794	0.000278475	0.00161921	-0.108165
PKP1	1.65616	11.8247	3.6761	0.000281939	0.00163517	-0.119601
ARSE	-1.03202	3.2087	-3.67046	0.000287943	0.00166386	-0.139091
FGFBP1	1.29223	9.57651	3.65433	0.000305808	0.00175275	-0.194753
ALDH1A2	-1.07703	5.64202	-3.65154	0.000309001	0.00176561	-0.204356
BARX1	1.30794	2.63137	3.64532	0.00031624	0.00179794	-0.225759
ERN2	-1.59083	5.74737	-3.63631	0.000327	0.00185192	-0.256678
ZG16B	-1.06749	5.79615	-3.62688	0.000338627	0.00190633	-0.288954
HOXC13	1.03566	5.98411	3.62679	0.00033874	0.00190633	-0.289264
CDHR5	-1.11897	2.20108	-3.61313	0.000356292	0.00198649	-0.335917
SERPINB12	1.29785	2.43643	3.61117	0.000358873	0.00199652	-0.34258
PLA2G2D	-1.0959	4.26917	-3.60774	0.000363438	0.00201754	-0.354249
HGD	-1.3372	3.19606	-3.60636	0.000365293	0.00202618	-0.358949
EPS8L3	-1.3915	2.43842	-3.58014	0.000402242	0.00219954	-0.447856
TSIX	-1.00191	8.78391	-3.55324	0.000443795	0.002391	-0.53849
TFF2	-1.02884	1.45928	-3.53011	0.000482684	0.00256143	-0.61587
VSIG2	-1.1567	4.60071	-3.52353	0.000494329	0.00261221	-0.637819
SLC44A4	-1.21462	8.07713	-3.52324	0.000494851	0.0026138	-0.638792
KRT6C	1.62089	10.6688	3.49474	0.000548403	0.00284961	-0.733345
KRT6A	1.57097	14.0736	3.49458	0.000548729	0.00285058	-0.733891
IL1A	1.13811	5.83015	3.49406	0.000549755	0.00285518	-0.735609
IL1F9	1.36851	5.06961	3.47753	0.000583326	0.00300363	-0.790109
ENTPD8	-1.08453	3.54465	-3.45666	0.000628465	0.00320064	-0.858597
NKAIN4	-1.00836	2.70041	-3.42817	0.000695383	0.00347658	-0.951492
CTSE	-1.34831	3.94208	-3.41304	0.000733566	0.00363024	-1.00053
SLC6A15	1.23626	3.10982	3.37914	0.000826337	0.00400701	-1.10968
TMEM139	-1.03136	5.19699	-3.34754	0.000922582	0.0043895	-1.21054
CDH17	-1.0066	3.10066	-3.33361	0.000968208	0.00457956	-1.25469
HOXD13	1.02571	5.73604	3.33302	0.000970187	0.0045851	-1.25656
SLC10A6	1.08943	4.30938	3.33284	0.000970808	0.00458697	-1.25714
DSG3	1.76004	10.8136	3.32709	0.00099032	0.00466906	-1.27533
KRT6B	1.42581	11.8197	3.28002	0.00116418	0.00533442	-1.42306
KRT5	1.432	15.2129	3.27782	0.00117294	0.00536856	-1.42991
CACNA1B	1.03045	2.86663	3.25658	0.00126098	0.00570645	-1.49591
NIPAL4	1.22964	6.56275	3.19668	0.00154322	0.0067437	-1.67983
C4BPB	-1.13086	2.48416	-3.1966	0.00154367	0.00674427	-1.6801
TM4SF4	-1.02809	1.41004	-3.19349	0.00155981	0.00680025	-1.68955
TP63	1.3976	10.4584	3.17018	0.00168592	0.00726954	-1.76021
SPDEF	-1.27418	6.15557	-3.16876	0.00169391	0.00729325	-1.7645
MUC13	-1.49727	4.73783	-3.15619	0.00176607	0.00754996	-1.80239
PGLYRP3	1.18148	4.70131	3.12305	0.00197015	0.00826194	-1.90158
CYP4B1	-1.21342	6.26312	-3.11858	0.00199929	0.0083709	-1.91489
AGR3	-1.39405	3.43251	-3.10762	0.00207241	0.00861491	-1.94744
AZGP1	-1.04373	4.65625	-3.10632	0.00208124	0.00864228	-1.95129
VIL1	-1.08335	1.79978	-3.0987	0.00213376	0.0088198	-1.97386
KRT31	1.10744	3.30135	3.09327	0.00217191	0.00895218	-1.9899
ADAM23	1.11342	4.79419	3.08394	0.00223893	0.00916602	-2.01741
PTPRZ1	1.21254	7.33907	3.0657	0.00237545	0.00961499	-2.07094
MUC2	-1.08168	4.17342	-3.04574	0.0025337	0.0101254	-2.12922
FOXN1	1.03849	6.39234	3.04427	0.00254572	0.0101655	-2.1335
FABP4	1.49047	5.3901	3.02877	0.00267567	0.0105915	-2.17844
CLDN10	-1.2701	4.22251	-3.02372	0.00271936	0.0107353	-2.19306
PITX2	1.12344	5.22186	3.02306	0.00272517	0.0107541	-2.19498
BNC1	1.39445	8.09305	3.02189	0.00273535	0.0107922	-2.19835
HEPHL1	1.20096	5.0647	3.02014	0.00275077	0.0108447	-2.20342
KLHDC7A	-1.04047	4.39043	-2.99803	0.00295179	0.0114715	-2.26701
SCGB3A1	-1.07556	2.92704	-2.99091	0.00301941	0.0116833	-2.28742
C20orf114	-1.631	4.4053	-2.98877	0.00303998	0.0117408	-2.29353
CASP14	1.48331	4.65254	2.97954	0.00313024	0.0120461	-2.31988
RGL3	-1.06595	5.1036	-2.96661	0.0032608	0.0124526	-2.35666
SPRR2D	1.4613	7.24192	2.95423	0.00339043	0.0128708	-2.39172
KRT7	-1.1597	12.1712	-2.94705	0.00346777	0.0131182	-2.41199
GJB1	-1.09891	3.35914	-2.92883	0.0036714	0.0137639	-2.46326
CLDN3	-1.17441	7.14037	-2.92712	0.0036911	0.0138276	-2.46806
PIGR	-1.52989	7.45993	-2.91953	0.00377945	0.0140908	-2.48929
SPRR2C	1.13016	3.58152	2.91544	0.00382788	0.0142566	-2.50072
AGR2	-1.17989	9.59842	-2.91447	0.00383946	0.0142945	-2.50343
AMTN	1.12896	3.8613	2.88653	0.00418692	0.0153701	-2.5811
FOXJ1	-1.22586	6.81061	-2.85784	0.00457312	0.0165123	-2.66009
LYPD2	-1.25867	4.54181	-2.85456	0.0046193	0.0166469	-2.66907
IVL	1.36413	7.8627	2.7673	0.00601442	0.0207121	-2.9045
GBP6	1.28479	7.93483	2.76402	0.00607356	0.0208771	-2.91321
WFDC2	-1.06516	10.513	-2.74654	0.00639804	0.0217695	-2.95949
DSC3	1.36833	11.0634	2.69335	0.00748414	0.0248013	-3.09859
SMOC1	-1.03334	5.87241	-2.6825	0.00772517	0.02546	-3.12665
CLCA2	1.38892	9.87587	2.68011	0.00777914	0.0256213	-3.13281
AQP5	-1.27641	6.44156	-2.67396	0.00791959	0.0259878	-3.14865
RHCG	1.3768	9.54491	2.66255	0.00818657	0.0266855	-3.17796
SPRR1B	1.40381	8.91607	2.65521	0.00836232	0.0271275	-3.19673
KIF1A	1.03405	2.65722	2.62725	0.00906413	0.0289953	-3.26786
ODZ2	1.07498	4.67641	2.62498	0.00912318	0.029156	-3.27359
FOLR1	-1.06606	4.41537	-2.6238	0.00915406	0.0292418	-3.27657
C10orf99	1.23304	6.55154	2.61976	0.00926077	0.0295228	-3.28678
AKR1C2	1.06317	8.03602	2.6149	0.00939047	0.0298666	-3.29904
SCGB2A1	-1.0614	3.5692	-2.54055	0.0115873	0.0353964	-3.48376
SPRR2A	1.28302	7.85273	2.51033	0.0126044	0.0378817	-3.55742
MUC6	-1.00905	3.37422	-2.4873	0.0134318	0.0398015	-3.61296
DSG1	1.00381	3.75409	2.45131	0.0148216	0.0431457	-3.69878
SPRR1A	1.265	7.84985	2.43111	0.0156566	0.0451081	-3.74644
KRT24	1.06706	3.43577	2.40721	0.0166976	0.0475782	-3.80232
CALB1	1.00555	3.18801	2.40243	0.0169128	0.0480843	-3.81343
MUC5B	-1.4077	5.95178	-2.39731	0.0171464	0.0486228	-3.82532
